# Supplementary material for: The Health Burden of Cancer Attributable to Obesity in Korea: A Population-Based Cohort Study
Source: PubMed Central journal article supplement — Cancer Res Treat. 2018 Oct 4;51(3):933–40. doi: 10.4143/crt.2018.301 (PMC6639210; doi:10.4143/crt.2018.301), 2018-10-04
Supplement: crt-2018-301-suppl3.pdf [file crt-2018-301-suppl3.pdf]

**S3 Table.** Prevalence (%) of body mass index category by age group in men and women

| Age group (yr) | Body mass index (kg/m <sup>2</sup> ) |               |               |               |             |                   |               |               |               |             |
|----------------|--------------------------------------|---------------|---------------|---------------|-------------|-------------------|---------------|---------------|---------------|-------------|
|                | Men (n=273,480)                      |               |               |               |             | Women (n=261,817) |               |               |               |             |
|                | < 18.5                               | 18.5-22.9     | 23.0-24.9     | 25.0-29.9     | ≥ 30.0      | < 18.5            | 18.5-22.9     | 23.0-24.9     | 25.0-29.9     | ≥ 30.0      |
| 40-44          | 18 (2.3)                             | 270 (34.2)    | 216 (27.3)    | 257 (32.5)    | 29 (3.7)    | 17 (3.2)          | 272 (50.5)    | 146 (27.1)    | 92 (17.1)     | 12 (2.2)    |
| 45-49          | 82 (2.1)                             | 1,333 (34.5)  | 953 (24.7)    | 1,389 (36.0)  | 102 (2.6)   | 84 (2.8)          | 1,351 (45.0)  | 759 (25.3)    | 724 (24.1)    | 85 (2.8)    |
| 50-54          | 641 (1.7)                            | 12,695 (33.8) | 10,555 (28.1) | 12,778 (34.0) | 903 (2.4)   | 746 (3.0)         | 12,247 (49.8) | 5,948 (24.2)  | 5,046 (20.5)  | 610 (2.5)   |
| 55-59          | 1,063 (1.6)                          | 21,656 (31.7) | 19,699 (28.8) | 24,303 (35.5) | 1,670 (2.4) | 1,041 (2.1)       | 21,850 (44.7) | 12,496 (25.6) | 12,081 (24.7) | 1,420 (2.9) |
| 60-64          | 793 (1.5)                            | 16,006 (31.1) | 14,946 (29.1) | 18,481 (35.9) | 1,198 (2.3) | 598 (1.5)         | 14,717 (35.7) | 11,349 (27.5) | 12,978 (31.5) | 1,561 (3.8) |
| 65-69          | 859 (2.1)                            | 12,873 (32.2) | 11,526 (28.8) | 13,885 (34.7) | 823 (2.1)   | 452 (1.4)         | 10,078 (30.6) | 9,048 (27.4)  | 11,892 (36.1) | 1,495 (4.5) |
| 70-74          | 825 (2.7)                            | 10,971 (35.7) | 8,651 (28.2)  | 9,709 (31.6)  | 567 (1.8)   | 541 (1.8)         | 8,717 (29.0)  | 8,025 (26.7)  | 11,356 (37.8) | 1,423 (4.7) |
| 75-79          | 903 (4.3)                            | 8,272 (39.0)  | 5,763 (27.2)  | 5,946 (28.0)  | 319 (1.5)   | 659 (2.8)         | 7,236 (30.4)  | 6,045 (25.4)  | 8,779 (36.9)  | 1,088 (4.6) |
| 80-84          | 645 (5.9)                            | 4,702 (43.1)  | 2,825 (25.9)  | 2,600 (23.9)  | 126 (1.2)   | 580 (3.8)         | 5,236 (34.4)  | 3,688 (24.3)  | 5,090 (33.5)  | 610 (4.0)   |
| ≥ 85           | 249 (6.0)                            | 1,920 (46.6)  | 1,031 (25.0)  | 877 (21.3)    | 41 (1.0)    | 374 (5.2)         | 2,768 (38.6)  | 1,635 (22.8)  | 2,160 (30.1)  | 241 (3.4)   |
| Total          | 6,078 (2.3)                          | 90,698 (33.7) | 76,165 (28.3) | 90,225 (33.5) | 5,778 (2.1) | 5,092 (2.2)       | 84,472 (37.1) | 59,195 (26.0) | 70,198 (30.9) | 8,545 (3.8) |

Values are presented as number (%).
